# Supplementary material
Source: PubMed Central journal article supplement (PMC5572822)
Supplement: NIHMS894112-supplement-Supplemental_Materials.pdf [file NIHMS894112-supplement-Supplemental_Materials.pdf]

**Full title:** Sox10+ cells contribute to vascular development in multiple organs

**Authors:**

Dong Wang, Fan Wu, Haoyong Yuan, Aijun Wang, Gyeong Jin Kang, Tan Truong, Lu Chen, Andrew S. McCallion, Xiaohua Gong and Song Li

From the Department of Bioengineering (D.W., F.W., A.W., S.L.), School of Optometry and Vision Science Graduate Program (D.W., G.J.K., T.T., L.C., X.G.), of the University of California, Berkeley; Department of Bioengineering of the University of California, Los Angeles (D.W., H.Y., S.L.); The Second Xiangya Hospital of Central South University (H.Y.); Surgical Bioengineering Laboratory, Department of Surgery, University of California, Davis School of Medicine (A.W.); McKusick-Nathans Institute of Genetic Medicine, Johns Hopkins University School of Medicine (A.S.M).

**Running title:** Sox10 in vascular development

**Corresponding author:** Song Li, Department of Bioengineering, University of California, Los Angeles, 5121 Engineering V, Los Angeles, CA 90095, United States

Email: [songli@ucla.edu](mailto:songli@ucla.edu)

Tel: (310) 794-6140

**SUPPLEMENTAL MATERIAL:**

Supplemental Figure I  
Supplemental Figure II  
Supplemental Figure III  
Supplemental Figure IV

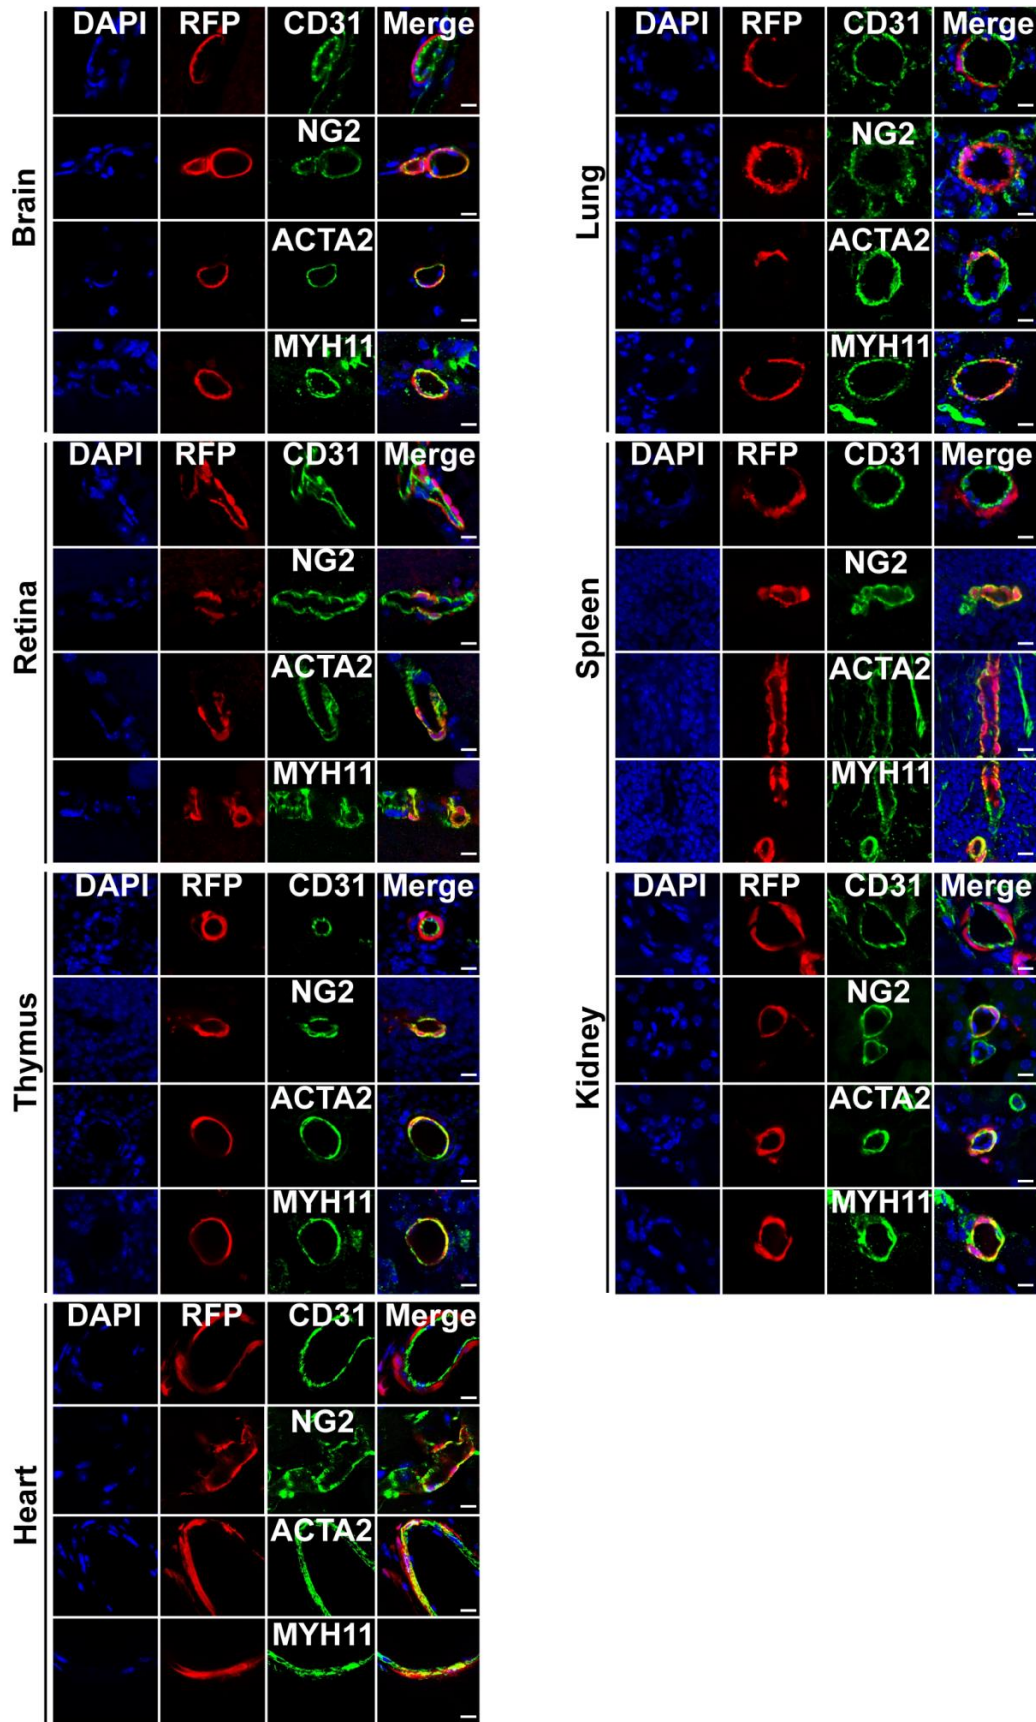

Supplemental Figure I. The cross sections of the brain, retina, thymus, heart, lung, spleen and kidney of Sox10-Cre/Rosa-LoxP-RFP mice were immunostained by the antibodies against CD31, NG2, ACTA2 and MYH11. Cell nuclei were stained by DAPI. Scale bar, 10  $\mu$ m.

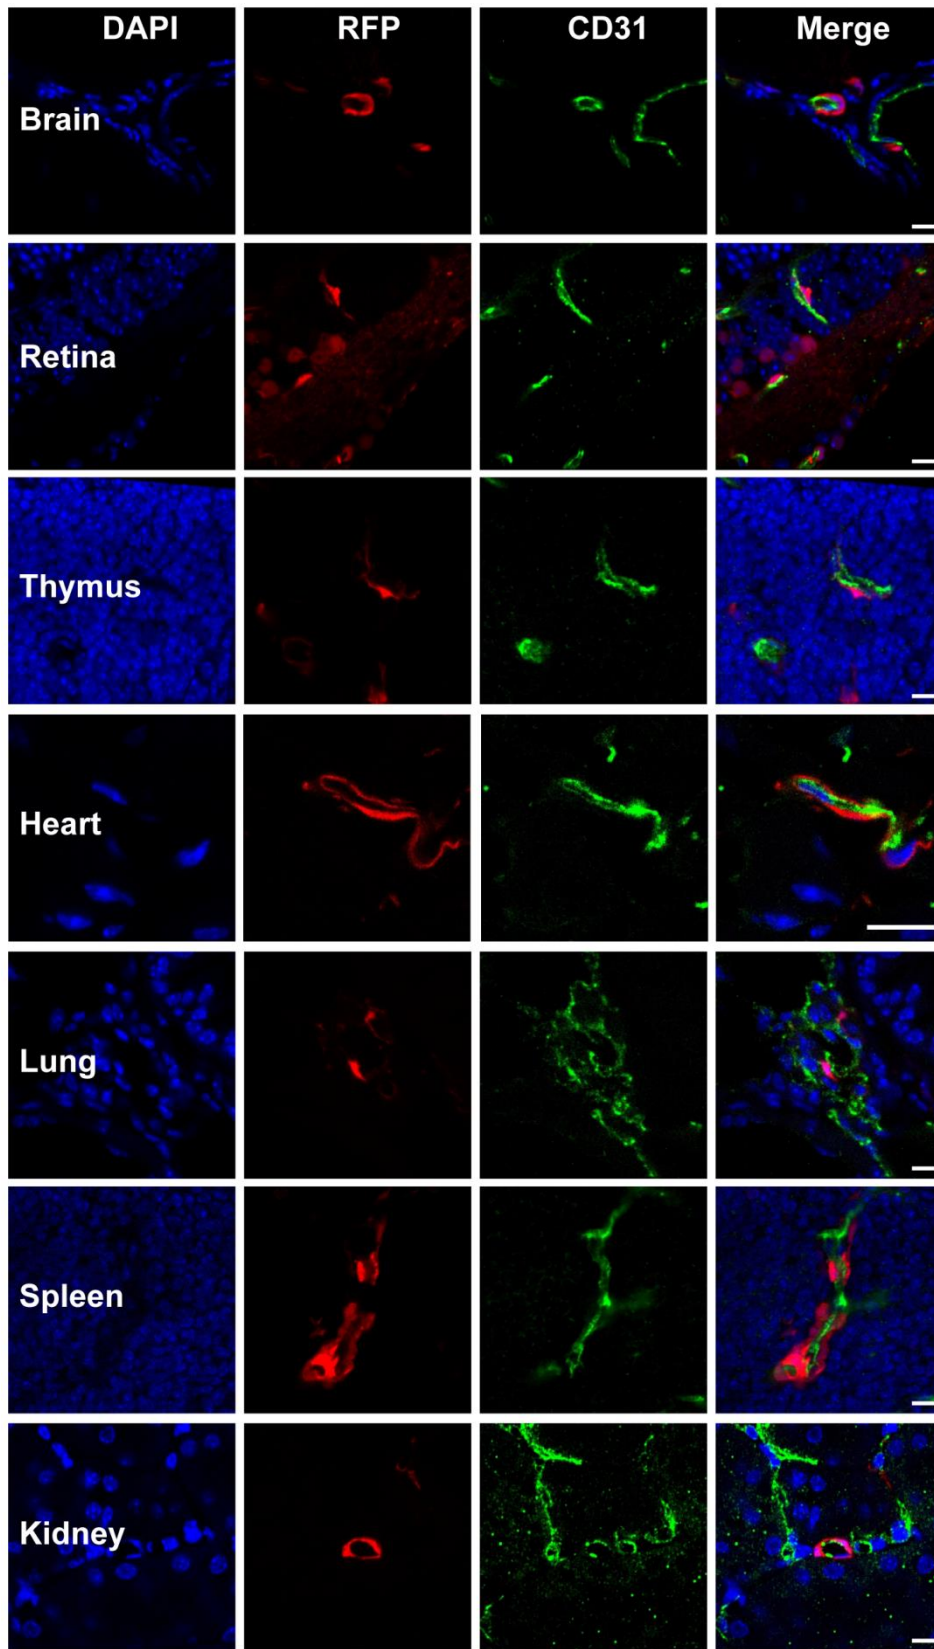

Supplemental Figure II. The cross sections of the brain, retina, thymus, heart, lung, spleen and kidney of Sox10-Cre/Rosa-LoxP-RFP mice were immunostained by the antibody against CD31. RFP+ capillaries were shown. Cell nuclei were stained by DAPI. Scale bar, 10  $\mu$ m.

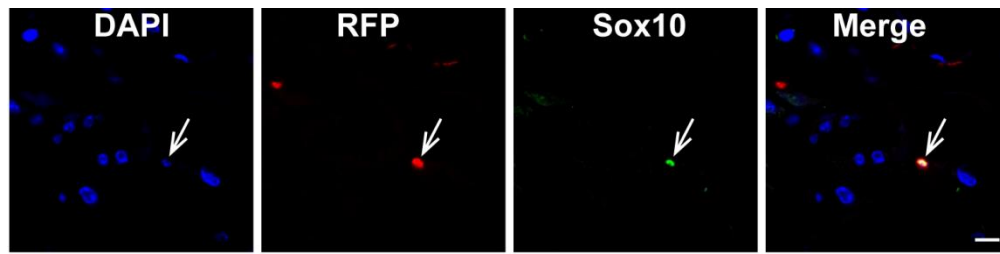

Supplemental Figure III. The cross section of subcutaneous loose connective tissues of Sox10-Cre/Rosa-LoxP-RFP mouse was immunostained by the antibody against Sox10. Cell nuclei were stained by DAPI. Scale bar, 10  $\mu$ m.

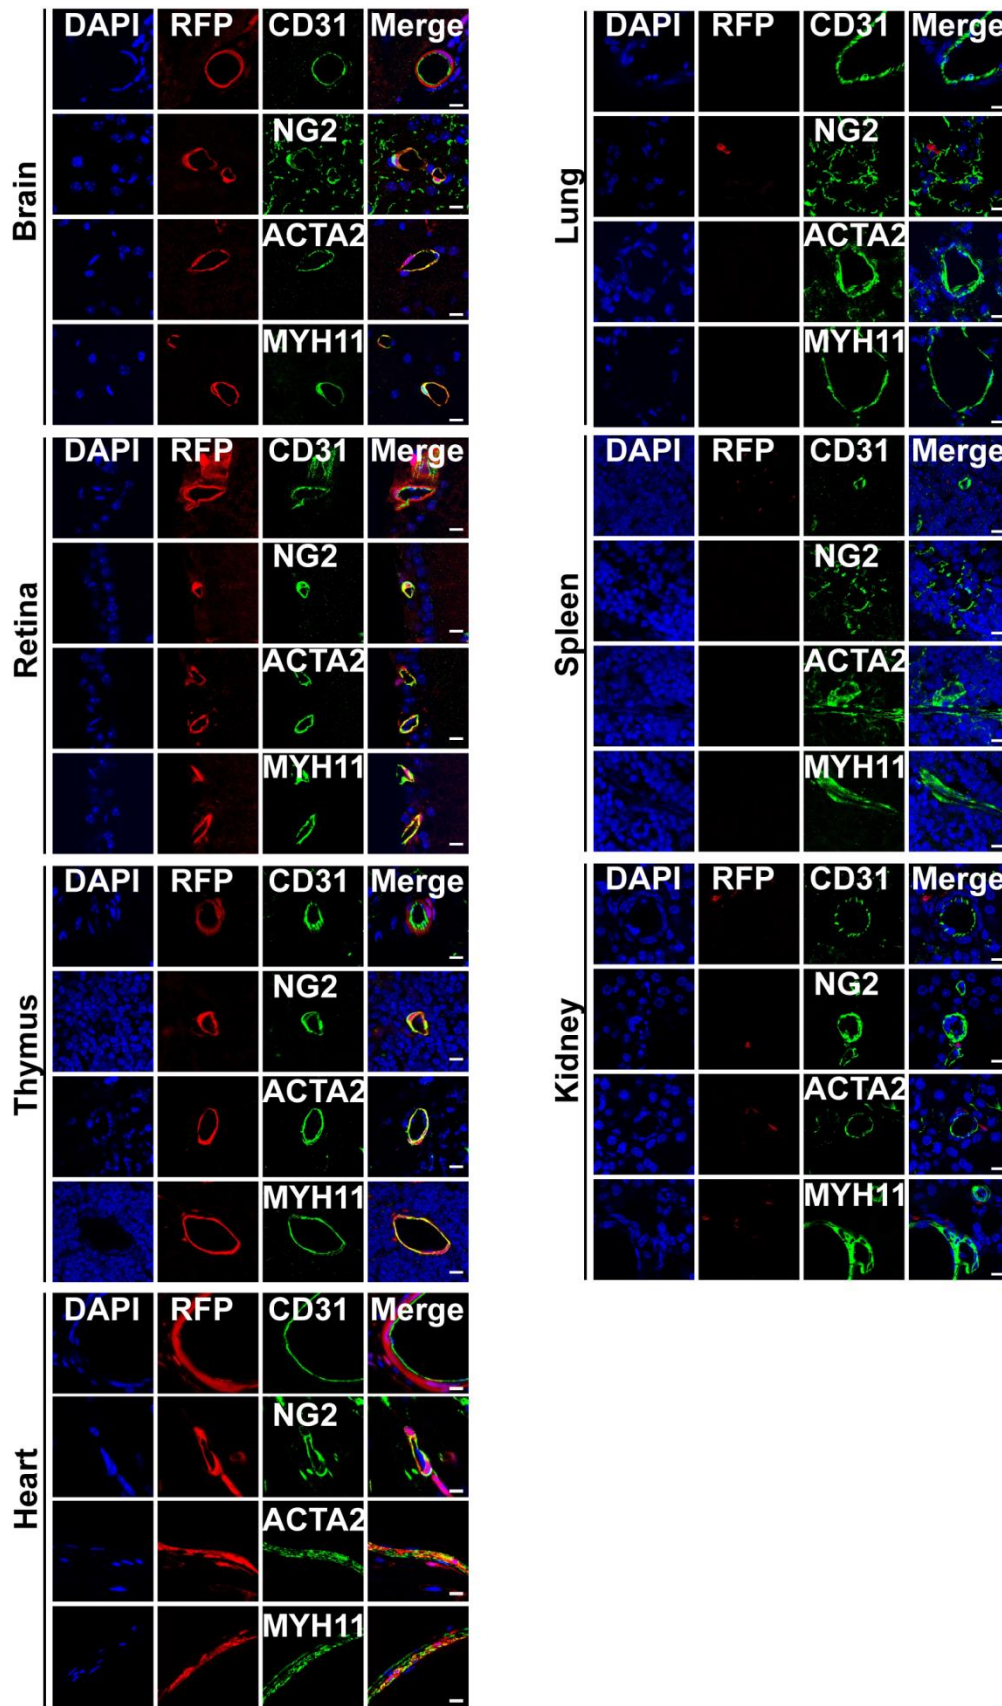

Supplemental Figure IV. The cross sections of the brain, retina, thymus, heart, lung, spleen and kidney of Wnt1-Cre/Rosa-LoxP-RFP mice were immunostained by the antibodies against CD31, NG2, ACTA2 and MYH11. Cell nuclei were stained by DAPI. Scale bar, 10  $\mu$ m.
